# Supplementary material for: Cathepsin L-induced galectin-1 may act as a proangiogenic factor in the metastasis of high-grade serous carcinoma
Source: PubMed Central journal article supplement (PMC6610868; doi:10.1186/s12967-019-1963-7), 2019-07-03

a)

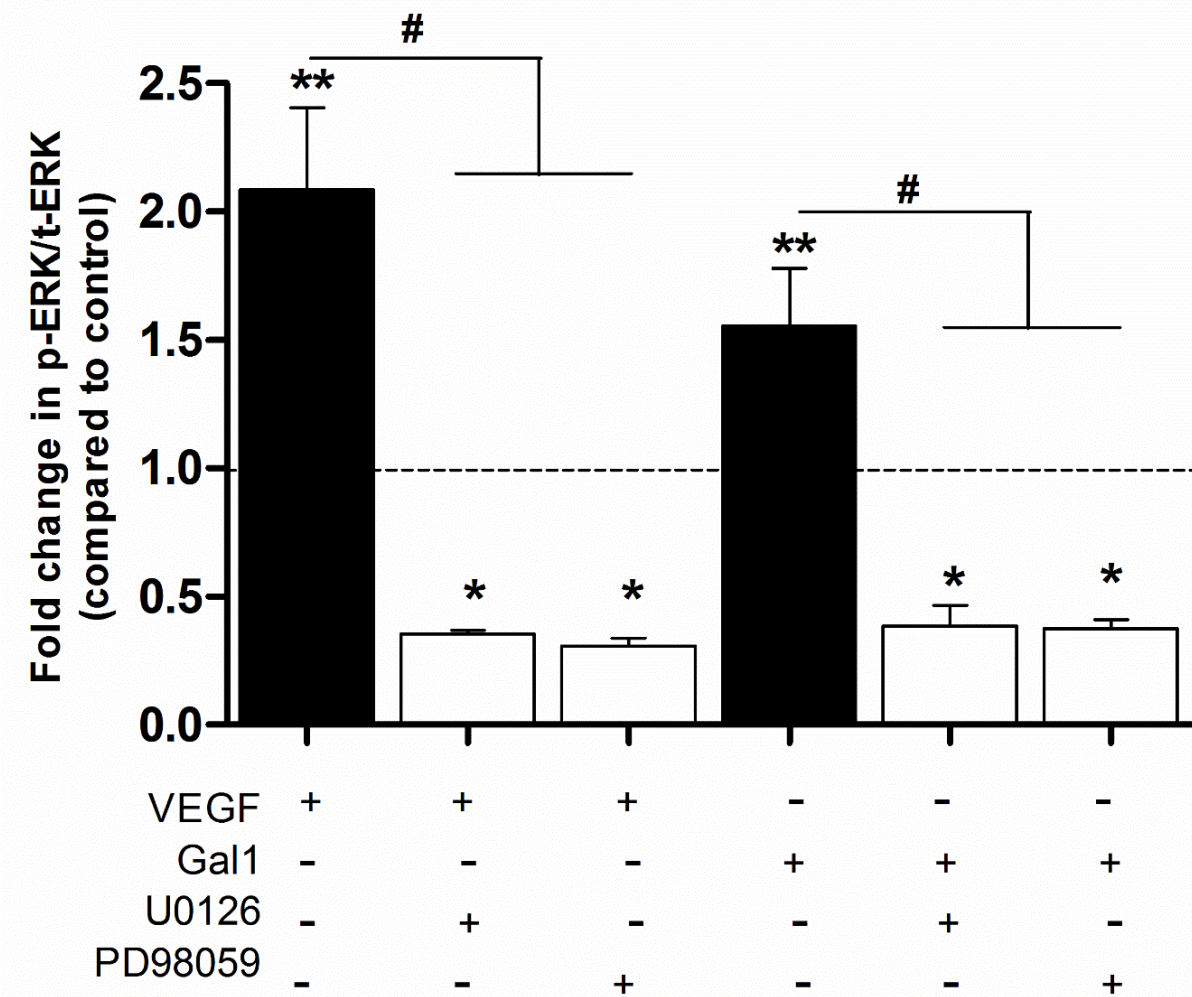

b)

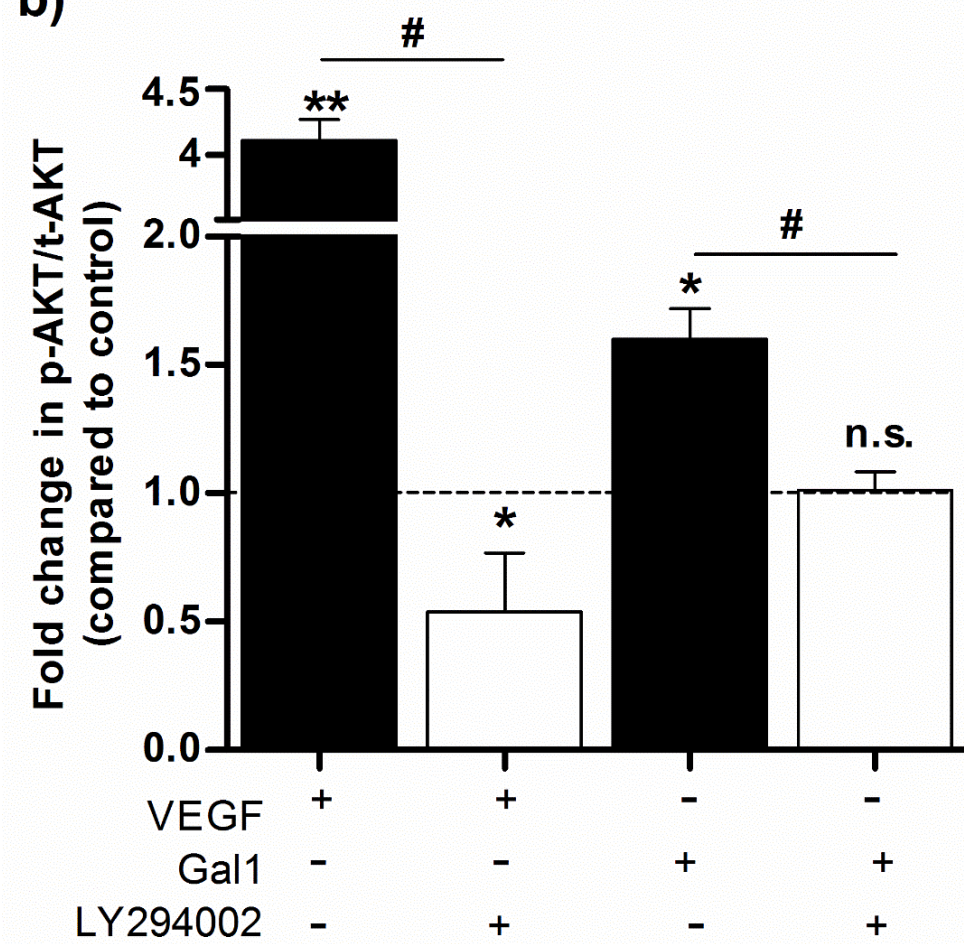

c)

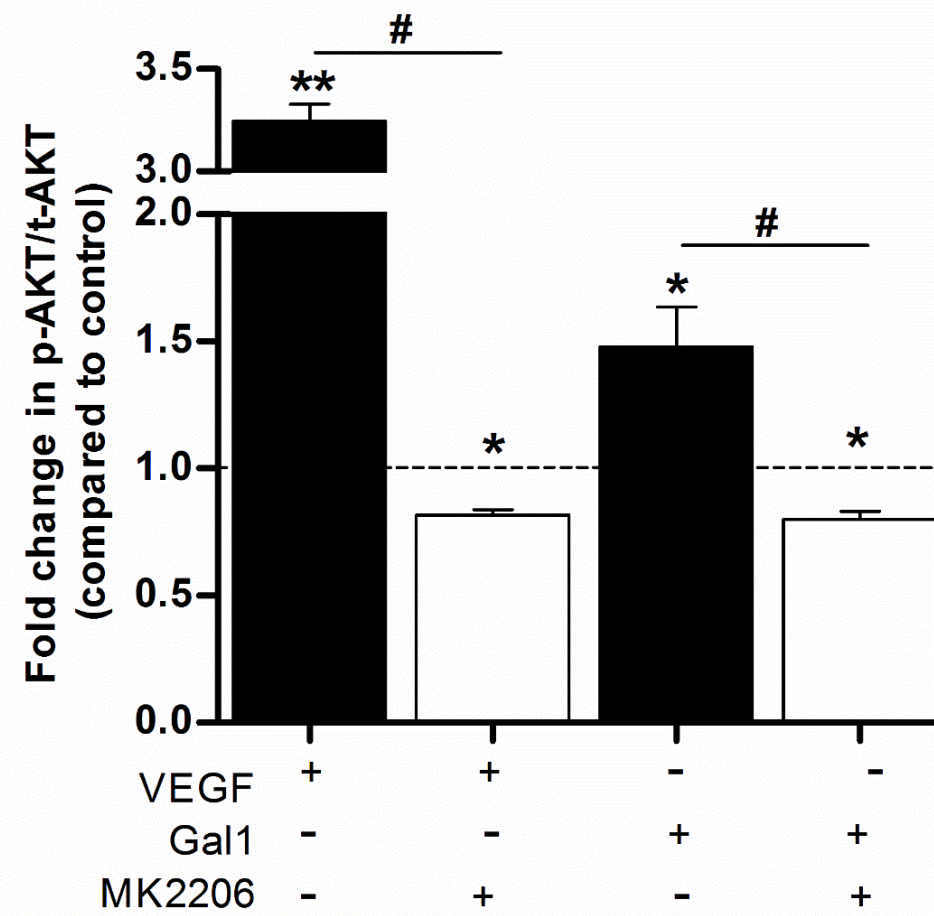

Supplement: 12967_2019_1963_MOESM1_ESM.pdf [file 12967_2019_1963_MOESM1_ESM.pdf]
