# Supplementary material for: Cathepsin L-induced galectin-1 may act as a proangiogenic factor in the metastasis of high-grade serous carcinoma
Source: Springer Nature journal article supplement (doi:10.1186/s12967-019-1963-7), 2019-07-03

Control

SC wo MTS

SC w MTS

Negative controls

Gal1

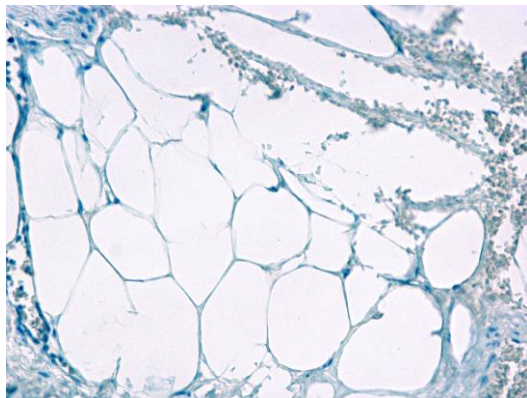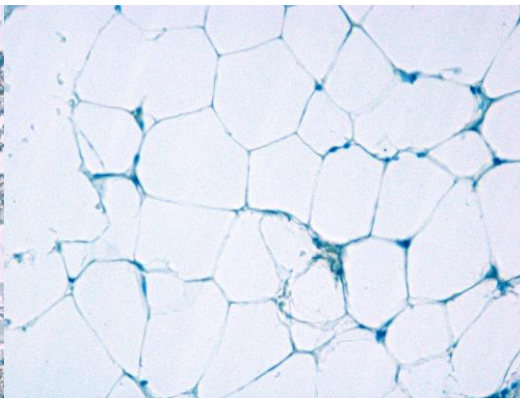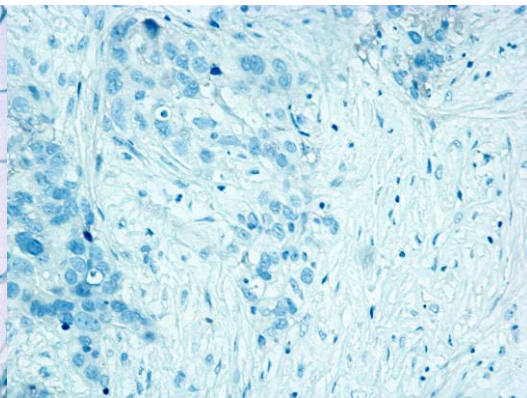

CD34

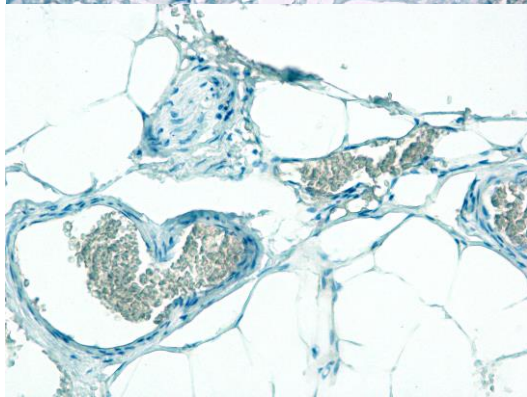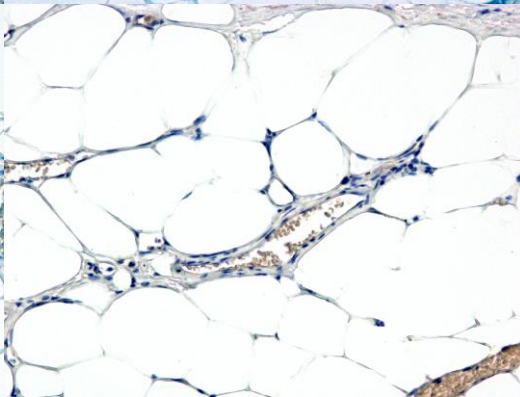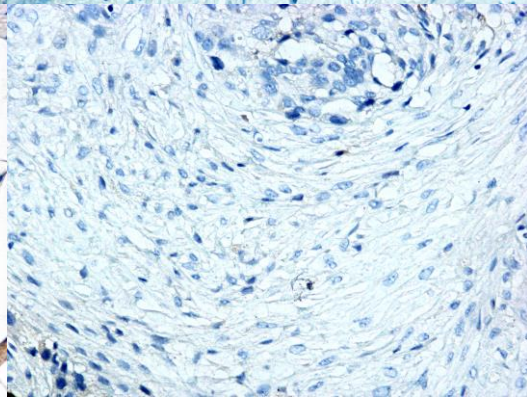

Supplement: MOESM2 [file 16879198]
